# Supplementary material
Source: PubMed Central journal article supplement (PMC8215681)
Supplement: NIHMS1710290-supplement-Supplemental_materials.pdf [file NIHMS1710290-supplement-Supplemental_materials.pdf]

## Supplementary Materials

### The list of all supplemental material

- 1) Figure S1. It demonstrates the experimental setup for measuring mobility of vesicles in astrocytes using TIRF microscope, which was described in Material and Methods. It helps to demonstrate how the data was collected.
- 2) Table S1. It is the results of one-way ANOVA test used in Figures 2, 3, and 4. The table supports the the statistical significance of the results.
- 3) Movie S1 and movie S2. They are the movies of movement of intracellular vesicles labeled by EGFP-CD63 (S1) and EGFP-VAMP3 (s2). The movies help to demonstrate how the data was processed.

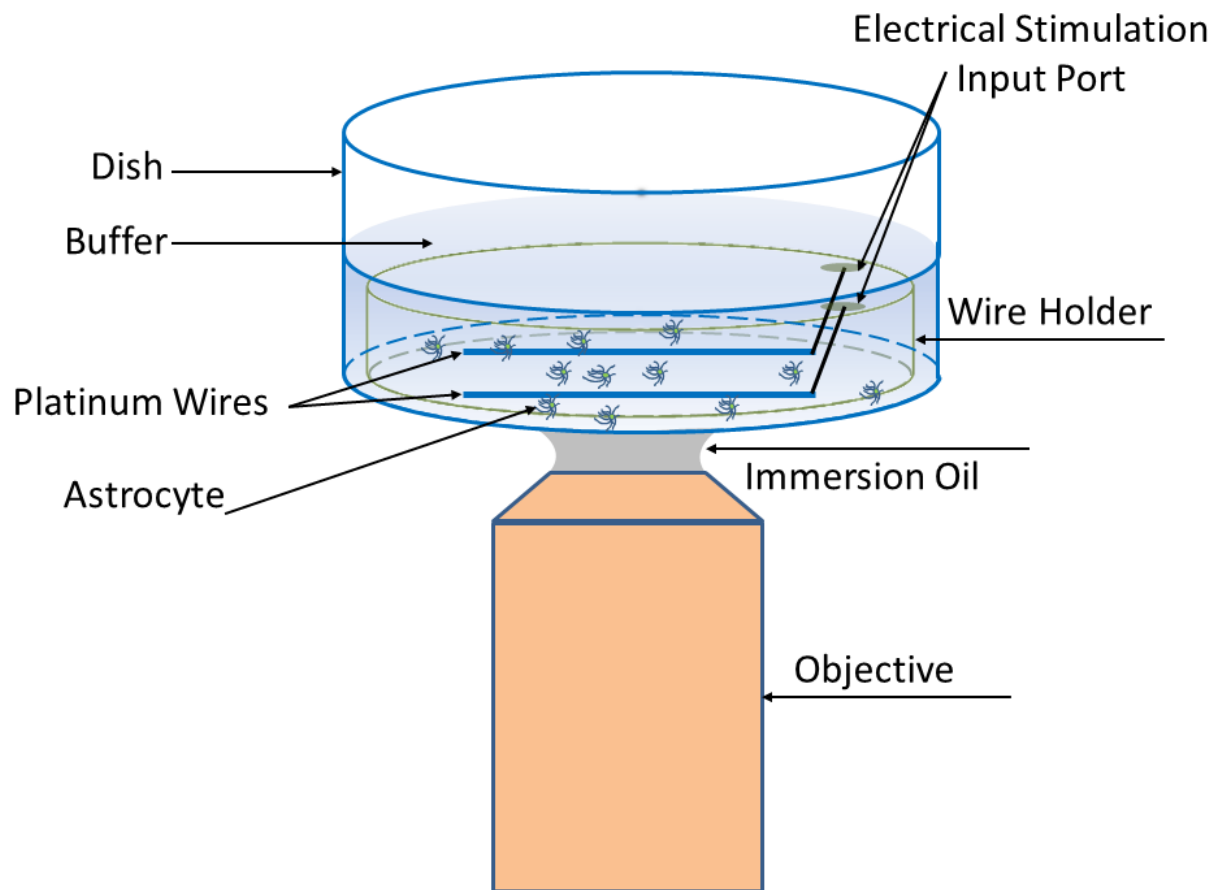

Figure S1

A schematic diagram of the experimental setup for measuring mobility of vesicles in astrocytes using TIRF microscope. The output of stimulus isolator was connected to platinum wires through two electrical stimulation input ports.

Table S1

**The results of one-way ANOVA used in Figures 2, 3, and 4**

| Figure   | SS<br>(Between<br>groups) | df<br>(Between<br>groups) | MS<br>(Between<br>groups) | SS<br>(Within<br>groups) | df<br>(Within<br>groups) | MS<br>(Within<br>groups) | F-<br>statistic | p-value |
|----------|---------------------------|---------------------------|---------------------------|--------------------------|--------------------------|--------------------------|-----------------|---------|
| Fig. 2C  | 0.1854                    | 1                         | 0.1854                    | 0.1158                   | 8                        | 0.0145                   | 12.80           | 0.0072  |
| Fig. 2D  | 0.0971                    | 1                         | 0.0971                    | 0.0653                   | 6                        | 0.0109                   | 8.92            | 0.0244  |
| Fig. 3C  | 0.1747                    | 1                         | 0.1747                    | 0.0845                   | 8                        | 0.0106                   | 16.55           | 0.0036  |
| Fig. 3D  | 0.1728                    | 1                         | 0.1728                    | 0.0375                   | 6                        | 0.0063                   | 27.64           | 0.0019  |
| Fig. 4A2 | 0.0499                    | 3                         | 0.0166                    | 0.0363                   | 12                       | 0.0030                   | 5.51            | 0.0130  |
| Fig. 4B2 | 0.0392                    | 3                         | 0.0131                    | 0.0298                   | 12                       | 0.0025                   | 5.26            | 0.0151  |
| Fig. 4A3 | 0.1046                    | 3                         | 0.0349                    | 0.0204                   | 12                       | 0.0017                   | 20.55           | 0.0001  |
| Fig. 4B3 | 0.0711                    | 3                         | 0.0237                    | 0.0409                   | 12                       | 0.0034                   | 6.95            | 0.0058  |
| Fig. 4C3 | 0.0370                    | 3                         | 0.0123                    | 0.0383                   | 12                       | 0.0032                   | 3.86            | 0.0381  |
| Fig. 4D3 | 0.0564                    | 3                         | 0.0188                    | 0.0329                   | 12                       | 0.0027                   | 6.86            | 0.0060  |

SS, Sum of squares.

df, Degrees of freedom.

MS, Mean squares.

Movie S1 and S2 (see attachment)
